# Supplementary material for: Photocatalytic and surface properties of titanium dioxide nanoparticles in soil solutions
Source: Royal Society of Chemistry journal article supplement (doi:10.1039/d3en00622k), 2024-01-01
Supplement: d3en00622k1.pdf [file d3en00622k1.pdf]

## Supplementary Information for:

### Photocatalytic and surface properties of titanium dioxide nanoparticles in soil solutions

**Authors:** Karolina Solymos<sup>1,2</sup>, Izabella Babcsányi<sup>2</sup>, Badam Ariya<sup>1</sup>, Tamás Gyulavári<sup>1</sup>, Áron Ágoston<sup>1,3</sup>, Ákos Szamosvölgyi<sup>1</sup>, Ákos Kukovecz<sup>1</sup>, Zoltán Kónya<sup>1</sup>, Andrea Farsang<sup>2†</sup>, Zsolt Pap<sup>1,4,5\*</sup>

<sup>1</sup>Department of Applied and Environmental Chemistry, University of Szeged, Szeged, Hungary

<sup>2</sup>Department of Geoinformatics, Physical and Environmental Geography, University of Szeged, Szeged, Hungary

<sup>3</sup>Department of Physical Chemistry and Materials Sciences, University of Szeged, Szeged, Hungary

<sup>4</sup>Nanostructured Materials and Bio-Nano-Interfaces Center, Institute for Interdisciplinary Research on Bio-Nano-Sciences, Babeş – Bolyai University, Cluj-Napoca, Romania

<sup>5</sup>Institute of Research-Development-Innovation in Applied Natural Sciences, “Babes-Bolyai” University, Cluj-Napoca, Romania

\*Corresponding author: pzsolt@chem.u-szeged.hu

## 2. Materials and methods

### Soil analysis

The pH was measured after mixing deionized water with the soil sample in a mass ratio of 1:2.5 using a digital pH meter (Inolab pH 720)<sup>1</sup>. The determination of the soil texture is based on the plasticity index values according to Arany (Arany plasticity index). The index value is calculated from the amount (cm<sup>3</sup>) of deionized water added to an air-dry soil sample (100 g) until reaching the upper limit of its plasticity, which is the moisture content at which a fine-grained soil can no longer be remolded without cracking<sup>2,3,4</sup>. The electrical conductivity ( $E_c$ ) and the total salt content were analyzed using an Orion 3-Star (Thermo Electron Corporation) conductivity meter. The soil samples were saturated in water ( $\pm 10 \mu\text{S}\cdot\text{cm}^{-1}$ ).

The organic matter (OM) contents were determined using a UV–vis spectrophotometer (Spectronic Helios- $\gamma$ , Thermo Fisher Scientific) after oxidation of the organic matter with 0.33 M  $\text{K}_2\text{Cr}_2\text{O}_7$  in the presence of 95%  $\text{H}_2\text{SO}_4$  overnight. As a result, the organic carbon content of the soil sample was oxidized, while  $\text{Cr}^{6+}$  ions were reduced to  $\text{Cr}^{3+}$  ions. The concentration of  $\text{Cr}^{3+}$  ions was measured at a wavelength of 590 nm, which is directly proportional to the organic carbon content<sup>5</sup>.

To determine the concentration of different major and trace elements (Na, K, Ca, Mg, Al, Fe, Mn, Zn, Cu, Ni, Co and As), 0.5 g of samples were weighted into a perfluoroalkoxy (PFA) vessel, and 7 mL aqua regia ( $\text{HNO}_3/\text{HCl} = 1:3$ ) was added. The soil samples were digested in a microwave oven (Anton Paar Multiwave 3000). The concentrations of the elements were determined by an ICP-OES (Optima 7000 DV, PerkinElmer) ( $\pm 10\%$  uncertainty)<sup>6</sup>.

**Table S1**

GPS coordinates of soil samples

| Sample name<br>(in the figure) | GPS coordinates            |
|--------------------------------|----------------------------|
| Cs1 (1)                        | 46°29'57.2"N, 20°12'28.3"E |
| Cs2 (2)                        | 46°29'58.0"N, 20°12'32.6"E |
| Cs3 (3)                        | 46°29'58.0"N, 20°12'30.1"E |
| Cs4 (4)                        | 46°29'58.2"N, 20°12'30.0"E |
| Cs5 (5)                        | 46°29'58.0"N, 20°12'28.0"E |
| Cs6 (6)                        | 46°30'30.1"N, 20°12'32.0"E |
| Cs7 (7)                        | 46°29'59.3"N, 20°12'31.3"E |
| Cs8 (8)                        | 46°29'59.0"N, 20°12'29.0"E |
| Cs9 (9)                        | 46°29'59.0"N, 20°12'27.1"E |
| Cs10 (10)                      | 46°29'59.1"N, 20°12'26.0"E |

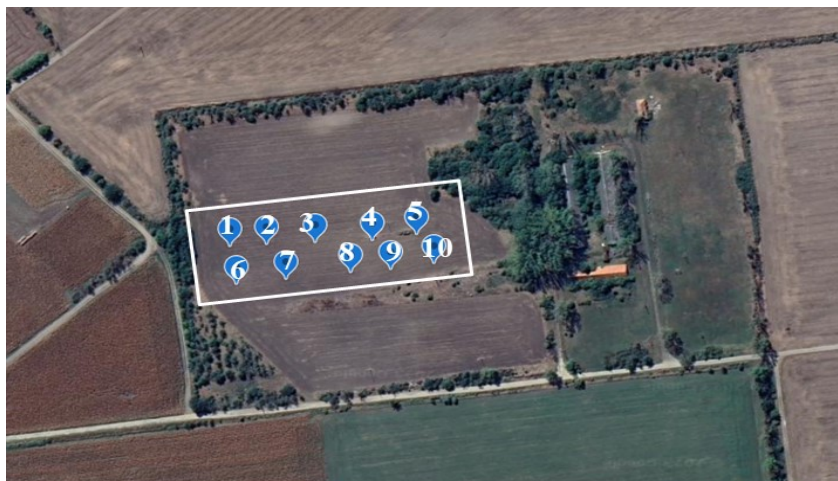

**Fig. S1.** Location of the soil samples

### 3. Results and discussion

**Table S2**

Basic properties of the soil samples

| Sample | pH d.w.* | Texture    | Ec ( $\mu\text{S}\cdot\text{cm}^{-1}$ ) | OM(%)* |
|--------|----------|------------|-----------------------------------------|--------|
| Cs1    | 7.86     | Sandy Loam | 538                                     | 1.94   |
| Cs2    | 7.82     | Sandy Loam | 471                                     | 2.42   |
| Cs3    | 7.82     | Sandy Loam | 665                                     | 3.16   |
| Cs4    | 7.81     | Sandy Loam | 670                                     | 3.1    |
| Cs5    | 7.84     | Sandy Loam | 591                                     | 2.84   |
| Cs6    | 7.9      | Sandy Loam | 482                                     | 3.22   |
| Cs7    | 7.78     | Loam       | 621                                     | 2.42   |
| Cs8    | 7.81     | Sandy Loam | 542                                     | 2.72   |
| Cs9    | 7.77     | Loam       | 717                                     | 2.58   |
| Cs10   | 7.74     | Sandy Loam | 715                                     | 2.7    |

**Table S3**

Total metal concentration of the soil samples

| $\text{mg}\cdot\text{kg}^{-1}$ |       |       |      |       |        |       |       |       |       |       |       |       |
|--------------------------------|-------|-------|------|-------|--------|-------|-------|-------|-------|-------|-------|-------|
| Sample                         | Cu    | Zn    | Co   | Ni    | Mn     | Na    | K     | Ca    | Mg    | Al    | Fe    | As    |
| Cs1                            | 24.48 | 72.84 | 8.02 | 26.80 | 577.96 | 359.1 | 12,45 | 26,59 | 10,13 | 32,46 | 25,45 | 11.44 |
| Cs2                            | 23.30 | 63.92 | 7.56 | 28.26 | 554.96 | 321.4 | 9,16  | 23,14 | 9,65  | 30,23 | 25,05 | 9.79  |
| Cs3                            | 22.90 | 55.61 | 7.57 | 24.78 | 554.76 | 399.5 | 10,42 | 24,65 | 9,87  | 34,8  | 26,44 | 9.81  |
| Cs4                            | 22.91 | 57.12 | 7.66 | 25.03 | 545.93 | 356.5 | 9,27  | 24    | 9,97  | 31,64 | 25,14 | 9.62  |
| Cs5                            | 22.68 | 55.16 | 7.47 | 24.58 | 544.98 | 303.6 | 8,64  | 24,36 | 9,55  | 29,83 | 24,58 | 9.62  |
| Cs6                            | 22.95 | 54.81 | 7.56 | 24.59 | 550.40 | 393.4 | 9,47  | 23,89 | 9,27  | 31,44 | 24,39 | 9.56  |
| Cs7                            | 23.03 | 54.82 | 7.55 | 24.39 | 550.02 | 320.1 | 11,35 | 22,9  | 9,25  | 29,89 | 24,39 | 9.66  |
| Cs8                            | 23.25 | 56.15 | 7.75 | 25.43 | 560.89 | 311.7 | 9,93  | 22,88 | 9,53  | 31,45 | 25,87 | 10.04 |
| Cs9                            | 26.54 | 58.69 | 7.77 | 25.13 | 554.88 | 382.6 | 9,87  | 24,69 | 10    | 33,22 | 25,85 | 9.67  |
| Cs10                           | 22.84 | 54.37 | 7.76 | 25.16 | 564.06 | 325.6 | 9,3   | 23,02 | 9,66  | 32,74 | 26,41 | 10.12 |

**Table S4**

Major and trace elements concentration of the soil solution samples

| Sample | $\mu\text{g}\cdot\text{L}^{-1}$ |       |      |       |      |      |       |       |
|--------|---------------------------------|-------|------|-------|------|------|-------|-------|
|        | Fe                              | Al    | Mn   | Zn    | Co   | Ni   | Cu    | As    |
| Cs1    | 38.58                           | 63.67 | 4.87 | 11.15 | 0.34 | 6.86 | 11.58 | 13.76 |
| Cs2    | 9.68                            | 5.34  | 1.8  | 4.84  | 0.54 | 6.87 | 14.04 | 14.19 |
| Cs3    | 5.55                            | 1.59  | 1.11 | 5.46  | 0.36 | 5.83 | 12.51 | 11.18 |
| Cs4    | 6.74                            | 2.06  | 3.77 | 2.30  | 0.91 | 9.75 | 16.6  | 13.48 |
| Cs5    | 5.99                            | 0.03  | 0.72 | 2.78  | 0.27 | 6.08 | 13.5  | 13.64 |
| Cs6    | 19.45                           | 14.96 | 1.28 | 3.64  | 0.38 | 5.98 | 13.97 | 12.37 |
| Cs7    | 37.64                           | 39.91 | 3.71 | 5.23  | 0.6  | 5.5  | 14.4  | 12.13 |
| Cs8    | 10.54                           | 4.04  | 1.3  | 2.94  | 0.29 | 5.93 | 13.47 | 14.9  |
| Cs9    | 8.09                            | 1.77  | 0.61 | 2.81  | 0.37 | 5.63 | 11.05 | 11.93 |
| Cs10   | 9.44                            | 4.99  | 0.67 | 2.45  | 0.21 | 5.18 | 11.48 | 10.84 |

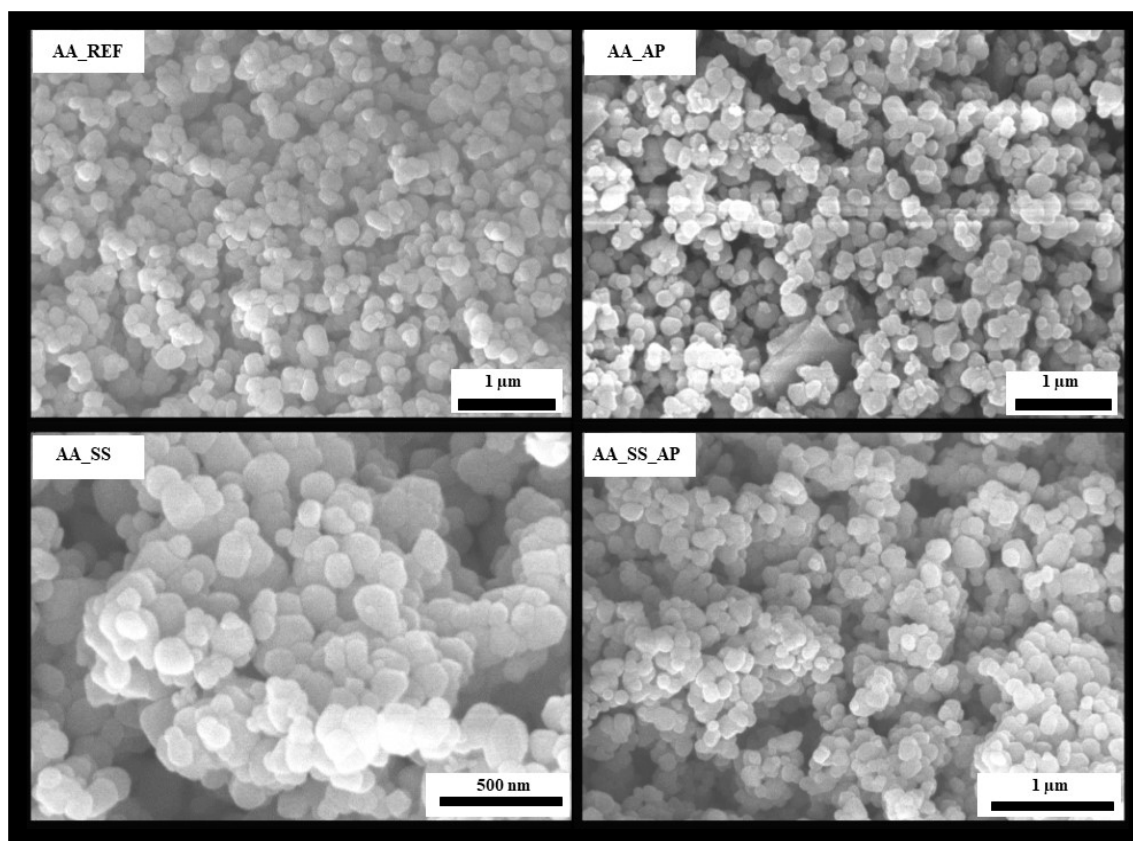

Fig. S2. SEM-micrographs of AA samples

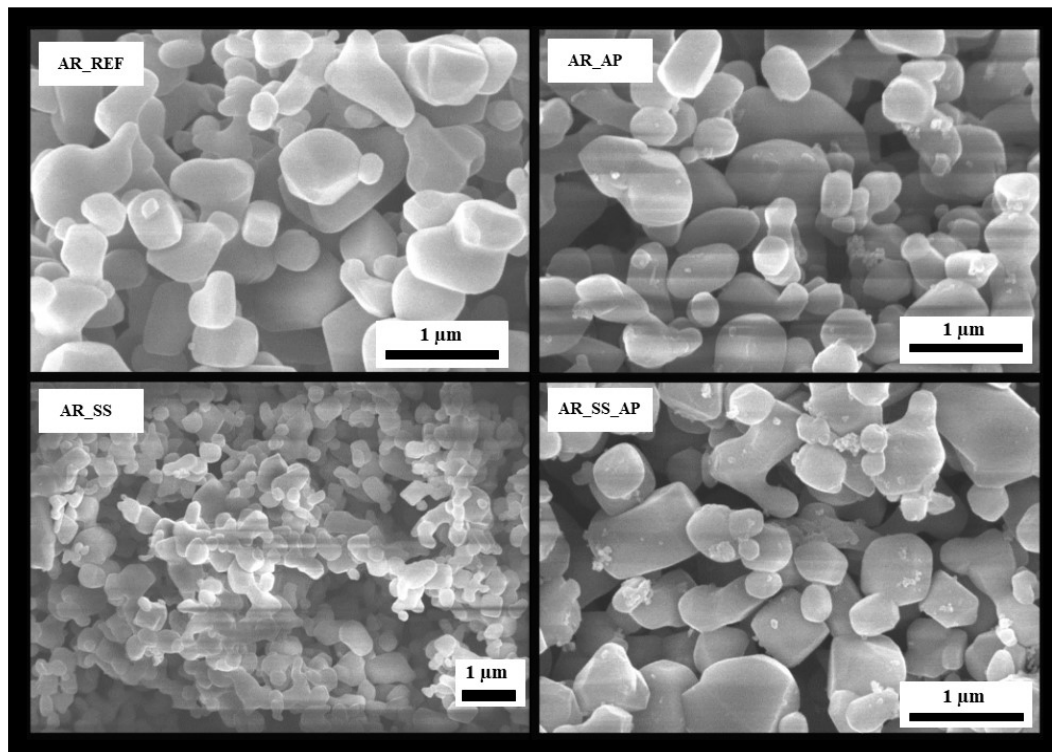

Fig. S3 SEM-micrographs of AA samples

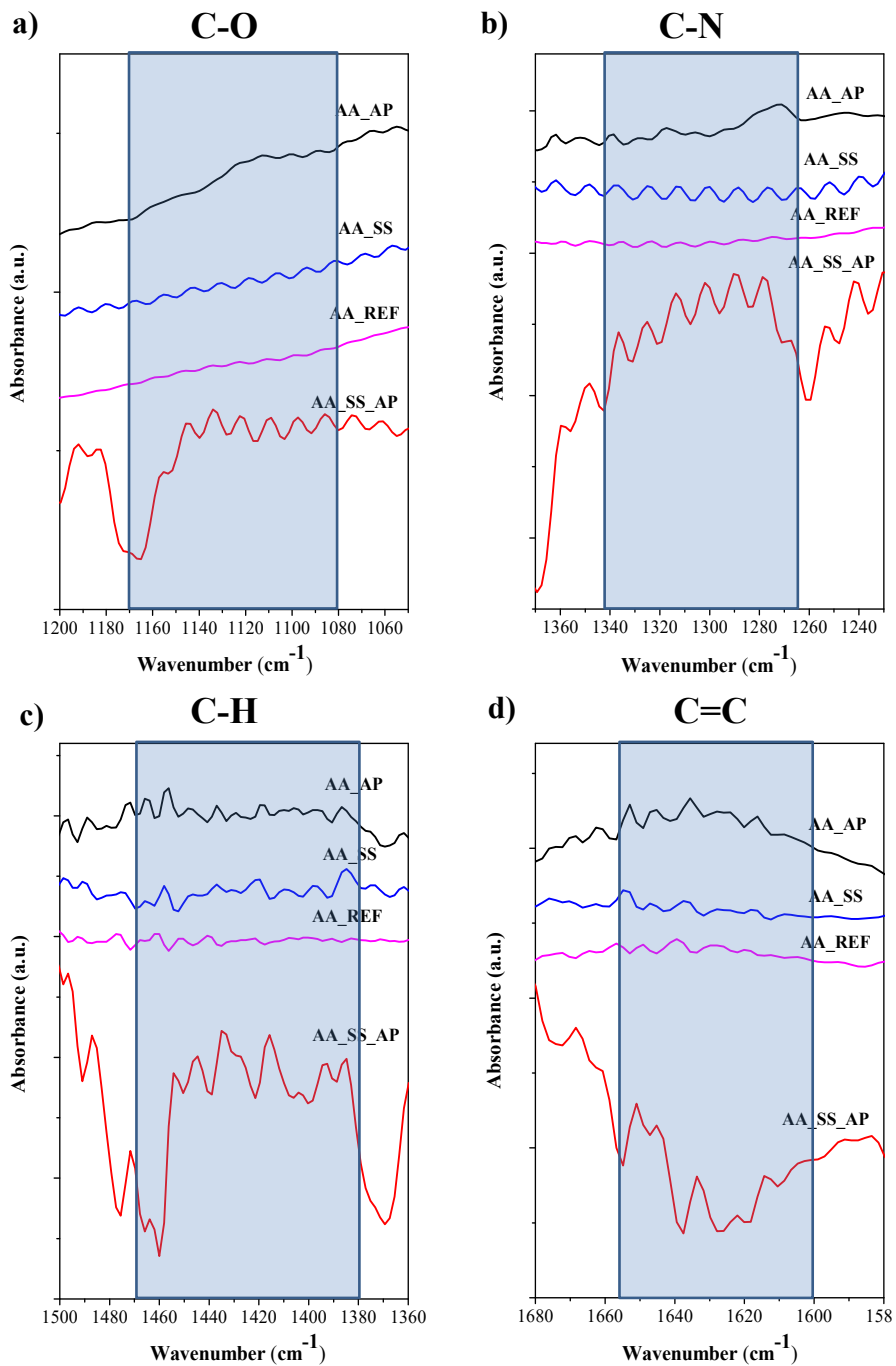

**Fig. S4.** IR spectra of AA samples: a) in the 1050-1200 cm<sup>-1</sup> region; b) in the 1220-1380 cm<sup>-1</sup> region; c) in the 1360-1500 cm<sup>-1</sup> region; d) in the 1580-1680 cm<sup>-1</sup> region

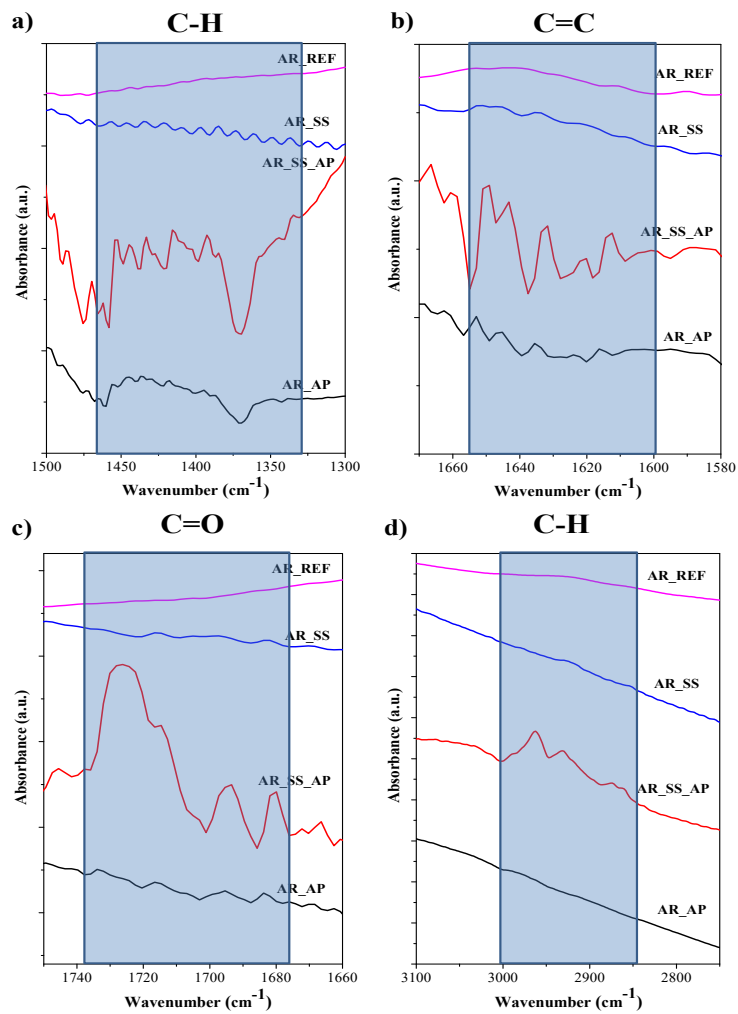

**Fig. S5.** IR spectra of AR samples: a) in the 1300-1500  $\text{cm}^{-1}$  region; b) in the 1580-1660  $\text{cm}^{-1}$  region; c) in the 1660-1750  $\text{cm}^{-1}$  region; d) in the 2750-3100  $\text{cm}^{-1}$  region

## References

1. MSZ-08–0206–2, *Journal*, 1978.
2. MSZ-08–0205, *Journal*, 1978.
3. Z. Szolnoki, A. Farsang and I. Puskás, *Environmental Pollution*, 2013, **177**, 106-115.
4. N. T. H. Pham, I. Babcsányi and A. Farsang, *Environmental Geochemistry and Health*, 2022, **44**, 1893-1909.
5. MSZ-21470–52, *Journal*, 1983.
6. MSZ-21470-50, *Journal*, 2006.
